# Control of *Septoria tritici* blotch by winter wheat cultivar mixtures: Meta-analysis of 19 years of cultivar trials

Rose Kristoffersen<sup>a</sup>, Lise Nistrup Jørgensen<sup>a</sup>, Lars Bonde Eriksen<sup>b</sup>, Ghita Cordsen Nielsen<sup>b</sup>, Lars Pødenphant Kiær<sup>c</sup>

<sup>a</sup>Aarhus University, Faculty of Science and Technology, Department of Agroecology, Forsøgsvej 1, 4200 Slagelse, Denmark

<sup>b</sup>SEGES, Agro Food Park 15, 8200 Aarhus N, Denmark

<sup>c</sup>University of Copenhagen, Faculty of Science, Department of Plant and Environmental Sciences, Thorvaldsensvej 40, 1871 Frederiksberg C, Denmark

---

## Abstract

Wheat is the most commonly grown cereal crop in Europe and in major parts the most yield limiting disease is *Septoria tritici* blotch (STB). Currently, the control of the disease depends on cultivar resistance and significant input of fungicides. The impact of using mixtures of elite cultivars as an alternative was investigated through a meta-analysis based on trial data from the Danish national cultivar testing. The cultivar testing includes a four-way cultivar mixture every year and in these trials STB severity and yield have been monitored at multiple locations between 1995 and 2017. Results from 19 years of cultivar testing trials provided a data set for 406 trials from which the effect of mixtures was evaluated. The meta-analysis revealed that cultivar mixtures reduced STB severity with 10.6% and increased yields with 1.4% across all trials. The effects were greatest in untreated trials where STB severity was reduced with 17% and yields increased with 2.4%. The mixtures did not only perform better than the average of their component cultivars grown as pure stand, they also performed better than the average of the four most grown cultivars in a given year. No relationship was found between disease pressure or location and the performance of the mixtures. The mixtures included in the cultivar testing were not designed to control STB and the results are therefore perceived as a baseline to the attainable disease control from mixtures. The use of cultivar mixtures is relevant for low input farming systems, but can also contribute to disease control in intensive farming systems. Cultivar mixtures have the potential to minimise dependency on fungicides as an important element in integrated pest management.

---

## 1. Introduction

*Septoria tritici* blotch (STB) caused by the fungus *Zymoseptoria tritici* is among the most devastating wheat diseases in Europe (Fones and Gurr, 2015). In the European Union (EU28), agriculture utilises 175 hectares, equivalent to 40% of the total area (Eurostat, 2015). According to The FAO (2013) wheat alone accounts for 33% of this area (Food and Agriculture Organization of the United Nations, 2019). The intensive wheat cultivation and high rainfall in the major wheat producing countries in Western Europe provides favourable conditions for a splash-dispersed disease as STB (Torriani et al., 2015). Without control measures, yield losses can reach 10-30% annually (Jørgensen et al., 2014). Currently, STB control is dominated by azole and SDHI fungicides (Kirikyali et al., 2017; Torriani et al., 2015). A pronounced reduction in field performances using azoles has been seen in many parts of Europe (Jørgensen et al., 2017) and also SDHIs are now challenged due to starting resistance in countries like Ireland and UK (Kildea et al., 2016). Alternative disease management strategies are necessary.

The annual disease epidemics in cereals are specific to cultivated ecosystems and are not found in their natural counterparts (McCann, 2000). Modern cropping systems with genetically uniform crops are very vulnerable to

---

Email address: [rose.kr@agro.au.dk](mailto:rose.kr@agro.au.dk) (Rose Kristoffersen)

14 biotic and abiotic disturbances and make an optimal environment for the formation and spread of pathogens  
15 (McCann, 2000; McDonald and Stukenbrock, 2016). Increasing biodiversity in cropping systems has been proposed  
16 as a key factor in creating more robust systems with less need for chemical control and essential in an integrated  
17 pest management framework (Stenberg, 2017). Diverse systems as intercropping or cultivar mixtures is associated  
18 with subsistence agriculture, but has been investigated in more modern agriculture (Smithson and Lenné, 1996).  
19 Lower forms of diversity such as cultivar mixtures that are diverse on gene level has great potential in reducing the  
20 negative effects of monocultures and increasing the production (Barot et al., 2017). Cultivar mixtures can reduce  
21 the epidemic development of a disease and increase yields (Borg et al., 2018; Finckh et al., 2000; Wolfe, 1985).  
22 Diversification has clear benefits, but when implementing methods that are not part of current farming practice  
23 it is important to address concerns from the growers about yields and management. Cultivar mixtures are low  
24 hanging fruit in increasing genetic diversity in the cereal production as the implementation requires little disruption  
25 of the management (Finckh et al., 2000).

26 Studies with mixtures specifically designed to control STB have showed potential in reducing this disease (Cowger  
27 and Mundt, 2002; Gigot et al., 2013; Mille et al., 2006; Vidal et al., 2017a). Meta-analyses of published articles have  
28 found diseases to play an important role in achieving yield increases through mixtures. Kiær et al. (2009) found a  
29 significant increase in yield by mixing cultivars when the component cultivars differed in disease resistance. Borg  
30 et al. (2018) documented a general yield increase by mixtures of 3.5% and 6.2% when mixtures were grown under  
31 high disease pressure. The meta-analysis by Reiss and Drinkwater (2018) found mixtures that were designed based  
32 on both disease and physical traits to increase yield under high disease pressure.

33 To investigate the effect of cultivar mixtures on STB a meta-analysis of field trial data from the national cultivar  
34 testing was conducted. Since 1991, official Danish cultivar trials have included a cultivar mixture as the standard  
35 against which other cultivars are measured. The cultivar mixture was introduced to ensure a stable measurement  
36 basis and to increase the continuity in the trials (Pedersen, 1995). These trials include random cultivar mixtures  
37 of high yielding cultivars available to the farmers and were not designed for STB control. As the purpose of the  
38 mixture design can have an impact on the efficacy of the mixture (Borg et al., 2018; Reiss and Drinkwater, 2018)  
39 the results from the non-designed mixtures in this study are produced with the aim of estimating a baseline for  
40 STB control by mixtures of elite cultivars. Even though the trials were not designed they still include mixtures with  
41 different proportions of susceptible and resistant cultivars and this information can be used to predict how mixtures  
42 can be designed to reduce STB. To make the obtained results applicable to farming in practice the efficacy of the  
43 mixtures were evaluated both on disease severity and on yield. A disease reduction is irrelevant to the farmer if  
44 mixtures in general are accompanied by a yield reduction. The performance of the mixtures was not only compared  
45 to the component cultivars but also to the cultivars the farmers commonly grow to evaluate the performance of the  
46 mixture against the standard practice.

47

48 The hypotheses tested in this study: 1) Non-designed cultivar mixtures of elite cultivars reduce STB severity and  
49 increase yields compared to the average of component cultivars, 2) The mixtures reduce STB severity and increase  
50 yield compared to the most grown cultivar in a given season, 3) Lower STB severity in mixtures contributes to  
51 higher yields in mixtures, 4) STB score of components from the previous season can predict the effect of cultivar  
52 mixing on STB disease severity.

## 53 **2. Materials and methods**

### 54 *2.1. Cultivar trials 1995-2017*

55 Cultivar testing has been performed in Denmark from 1995-2017 in a collaboration between SEGES (the Farmers  
56 Union), and Tystoftefonden, which is performing Value for Cultivation and Use (VCU) tests for the national listing.  
57 During this period, field trials were conducted using a similar protocol across sites and years. A mixture of four

58 cultivars was defined each year to be used as a reference. Original observation data from these trials was used in  
59 this study to investigate the effects of these non-designed cultivar mixtures of winter wheat on STB severity and  
60 yield.

61 The winter wheat cultivars included in the reference cultivar mixture have been continuously up for evaluation  
62 replacing a single component cultivar each year (table 1) (Pedersen, 1995). 73% of the mixtures included cultivars  
63 from three different breeders (not shown). Data regarding the most commonly grown cultivars were obtained from  
64 sales statistics at [sortinfo.dk](http://sortinfo.dk) and included for comparison (table 1).

65 The trials were sown as randomised complete block design or alpha-design with incomplete blocks with three  
66 to six replicates. Plot sizes varied from 14 m<sup>2</sup> to 20 m<sup>2</sup> placed at locations across Denmark at farmers' fields, field  
67 stations and breeding companies. They were either one-factor trials with only fungicide-treated plots, or two-factor  
68 trials including both treated and untreated control plots. Fungicide treatments were applied by the individual  
69 farmers and varied between locations according to local practices, consisting of two to three treatments with a  
70 reduced dose of the most effective azoles, strobilurins and SDHIs at the time. Typically, the dose rate applied was  
71 30-75% of a full standard rate for the compound. Additionally, fungicide treated and control plots in each trial  
72 were all treated with herbicides, insecticides, growth regulators and fertiliser according to the requirement at the  
73 individual location. The harvested grain was measured as kg/plot and transferred to yield per ha (dt/ha)  
74 adjusted to 15% moisture content. STB severity was assessed visually around GS 69-75 two weeks after the last  
75 fungicide treatment of the trial, typically around applied in the period 5.-20. June. Severity was measured as a  
76 total plot score of percentage disease coverage by technicians from the different trial units.

Table 1: The components of the standard cultivar mixture included in the national Danish cultivar tests 1995-2017 and the cultivars with the largest certified seed sale each year (SortInfo.dk). *Italics* denote new cultivars in the reference mixture. Use statistics (and thus the most grown cultivars) was first registered in 1999.

| Year  | Mixture components                               | Most grown cultivars in given year      |
|-------|--------------------------------------------------|-----------------------------------------|
| 1994  | Pepital, Haven, Hereward, Nova                   | -                                       |
| 1995  | Pepital, Haven, Hereward, <i>Hussar</i>          | -                                       |
| 1996  | <i>Ritmo</i> , Haven, Hereward, Hussar           | -                                       |
| 1997  | Ritmo, <i>Trintella</i> , Hereward, Hussar       | -                                       |
| 1998  | Ritmo, Trintella, <i>Pentium</i> , Hussar        | -                                       |
| 1999  | Ritmo, Trintella, Pentium, <i>Cortez</i>         | Ritmo, Stakado, Trintella, Lynx         |
| 2000  | Ritmo, Trintella, Pentium, Cortez                | Ritmo, Stakado, Kris, Cortez            |
| 2001  | Ritmo, <i>Terra</i> , Pentium, Cortez            | Ritmo, Kris, Stakado, Baltimor          |
| 2002* | Ritmo, <i>Solist</i> , Pentium, Cortez           | Bill, Ritmo, Stakado, Kris              |
| 2003  | Ritmo, Solist, Pentium, <i>Boston</i>            | Solist, Bil, Senat, Ritmo               |
| 2004* | Ritmo, Solist, <i>Galicía</i> , Boston           | Deben, Grommit, Hattrick, Bill          |
| 2005* | Ritmo, Solist, Galicía, <i>Skalmeje</i>          | Deben, Hattrick, Robigus, Smuggler      |
| 2006  | Ritmo, Solist, <i>Ambition</i> , Skalmeje        | Smuggler, Robigus, Hattrick, Samyl      |
| 2007  | <i>Fru ment</i> , Solist, Ambition, Skalmeje     | Smuggler, Skalmeje, Robigus, Samyl      |
| 2008  | Fru ment, <i>Hereford</i> , Ambition, Skalmeje   | Ambition, Smuggler, Skalmeje, Fru ment  |
| 2009  | Fru ment, Hereford, Ambition, <i>Contact</i>     | Fru ment, Ambition, Hereford, Smuggler  |
| 2010  | Fru ment, Hereford, Ambition, <i>Mariboss</i>    | Hereford, Fru ment, Ambition, Oakly     |
| 2011  | Fru ment, Hereford, <i>Jensen</i> , Mariboss     | Hereford, Mariboss, Fru ment, Tabasco   |
| 2012  | <i>KWS Dacanto</i> , Hereford, Jensen, Mariboss  | Hereford, Mariboss, Jensen, Tabasco     |
| 2013  | KWS Dacanto, Hereford, Jensen, Mariboss          | Mariboss, Jensen, Hereford, KWS Dacanto |
| 2014  | KWS Dacanto, Hereford, Jensen, Mariboss          | Mariboss, Jensen, KWS Dacanto, Hereford |
| 2015  | KWS Dacanto, <i>Benchmark</i> , Jensen, Mariboss | Mariboss, KWS Dacanto, Hereford, Jensen |
| 2016  | KWS Dacanto, Benchmark, <i>Torp</i> , Mariboss   | Torp, Mariboss, KWS Dacanto, Hereford   |
| 2017  | KWS Dacanto, Benchmark, Torp, <i>Kalmar</i>      | Torp, Benchmark, Pistoria, KWS Lili     |

\* One or more component cultivars missing in pure stand, not included in the analysis

## 77 2.2. Data filtering and meta-analysis

### 78 2.2.1. Filtering of data

79 Data quality was ensured by filtering data according to a number of criteria. Only field trials where all four  
80 component cultivars were also grown in pure stand were included, resulting in the exclusion of three trial years  
81 (2002, 2004 and 2005). Only trials with data from at least three replicates, and STB severity data from at least  
82 half the plots, were included in the analysis. For trials with more than two fungicide treatments (e.g. spraying  
83 rates; 30 trials in total), only control (untreated) and standard treatments were used. To avoid unrealistically large  
84 or small values when calculating STB mixing effects (see below), a minimum threshold of 2% STB disease severity  
85 (averaged across the four components) was applied. From the data obtained, yield was registered for all trials, but  
86 STB severity data was sometimes absent.

### 87 2.2.2. Process

88 The data analysis consisted of three steps:

- 89 1. Calculation of yield and STB severity estimates for the cultivars and reference mixture in each trial.
- 90 2. Calculation of mixing effect for each trial.

91 3. Meta estimates for yield and STB mixing effects through meta-analysis.

### 92 2.2.3. Estimating yield and STB severity in field trials

93 Yield and STB estimates for the cultivars and reference mixture were obtained for each field trial using linear  
94 mixed models per the package 'lme4' (Bates et al., 2015) for R (R Core Team, 2018). Models were fitted for the  
95 different designs included in the experiments Models were fitted for the different designs included in the experiments  
96 as  $obs \sim ct + block | rep + rep$ , where *obs* denotes grain yield measurements or STB disease severity (as percentages),  
97 *ct* denotes the cultivar (pure stands and mixture) used as explanatory factor, *block* denotes the random intercepts  
98 of incomplete blocks (for alpha designs only), and *rep* denotes the random intercepts of replicates. A subset of the  
99 data was tested and found to follow a normal distribution for yield and a log-normal distribution for STB and so  
100 the remaining STB data was log transformed before further analysis.

### 101 2.2.4. Mixing effects

102 Estimates from the fitted linear mixed models with yield and STB as response variables, respectively, were used  
103 to calculate mixing effects of either response type, using the log response ratio (lnRR) as described by Hedges et al.  
104 (1999). The lnRR is the natural logarithm of the ratio between treatment (here, the mixture estimate) over the  
105 control (here, the average of the pure stand estimates of component cultivars).

### 106 2.2.5. Meta-analysis and moderators

107 Meta-analysis was performed by fitting mixed models as integrated in the *rma.mv* function of the R package  
108 'metafor' (Viechtbauer, 2010). Effect sizes lnRR and their variances were used as response variable, and year and  
109 year-within-location were used as random effects. A series of meta-analyses were performed with different modera-  
110 tor variables (table 2) that might influence mixing effect.

111  
112 Disease pressure was estimated for each field trial in two ways. First, as the average STB severity of all pure  
113 stand cultivars in the trial in treated or untreated plots. Second, as average yield response to fungicide treatment,  
114 calculated per location and based on the fungicide response map created by SEGES and the Danish Technological  
115 Institute (DTI) (figure 1) as calculated from field trial data in the period 2002-2016 (Nielsen and Trénel, 2017). This  
116 local fungicide response was used as an indirect measure of disease pressure as estimates were based on trial data  
117 on response from diseases. Septoria was the main target for the modelling and yellow rust (*Puccinia striiformis*)  
118 above 1% was excluded from the analysis (Nielsen and Trénel, 2017). These estimates of disease pressure (1-10)  
119 were linked to each trial location by postcode (local disease pressure). The map was further divided into seven  
120 regions with similar scores (regional disease pressure). 'High disease pressure' was defined as disease pressure above  
121 8%, with 66% of data for treated plots falling below this threshold.

122  
123 Component susceptibility information was obtained from the official susceptibility score of the individual com-  
124 ponent cultivars that was measured in the national observation plots (published on SortInfo.dk) and available at the  
125 time of sowing each year. These scores were used to derive single moderators including means, ranges and standard  
126 deviations, or categorised into susceptible/resistant based on different thresholds for a resistant cultivar.

127  
128 Meta-estimates were back transformed (as  $\exp(\text{estimate})-1$ ) in order to report the relative difference between  
129 mixture and pure stand yields and disease observations.

Table 2: List of moderators used and the various mixing effects they have effect on.

| Effect of                | On                          |
|--------------------------|-----------------------------|
| STB mixing effect        | Yield mixing effect         |
| Disease pressure         | STB and yield mixing effect |
| Component susceptibility | STB mixing effect           |

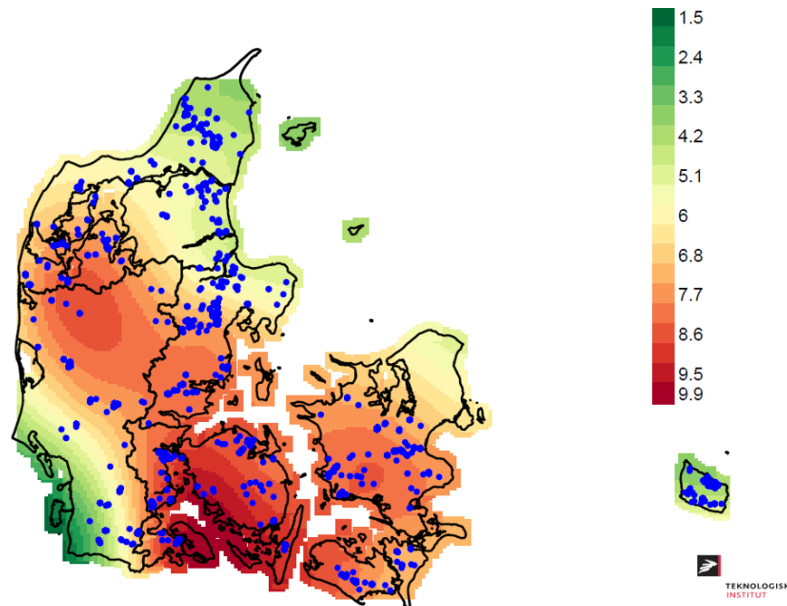

Figure 1: Map of yield increase (hkg/ha) from fungicide applications used to estimate disease pressure. Blue dots represent trial locations. The map was produced by SEGES and the Danish Technological Institute (DTI) (Nielsen and Trénel, 2017).

### 130 3. Results

131 The filtering of field trial data resulted in 569 unique mixtures cultivated across 406 trials. Of these, 319 mixtures  
 132 across 221 trials could be used to estimate the overall STB mixing effect. Treated and untreated plots differed in  
 133 STB severity and yields (table 3). On average untreated plot were more affected by STB and had lower yields  
 134 compared to the fungicide treated plots. There was a significant negative correlation ( $p < 0.001$ ) between STB  
 135 severity and yield across the trials with an estimated effect of 19% meaning that field with a disease severity of  
 136 50% would correspond to a 9.5% yield loss. The susceptibility to STB for specific cultivars included in the mixtures  
 137 ranged from 0.8% to 19% with an average of 7.7% when grown in pure stand.

Table 3: Average yield and disease severity across the field trials included. In parenthesis the standard deviation of the estimate.

|                 | STB disease severity, % | Yield, hkg/ha       |
|-----------------|-------------------------|---------------------|
| Untreated plots | 16.3 ( $\pm 16.8$ )     | 78.5 ( $\pm 15.9$ ) |
| Treated plots   | 6.1 ( $\pm 7.9$ )       | 88.8 ( $\pm 15.2$ ) |

138 *3.1. Mixing effects on STB*

139 Across all field trials, the non-designed cultivar mixtures reduced STB severity with 10.6% compared to the  
140 average of the component cultivars in pure stand (figure 2). The highest reduction was observed in untreated plots  
141 where mixtures reduced STB severity with 17%. Mixtures exhibited 12.3% less STB than the average of the four  
142 most grown cultivars each year, overall (figure 2). This effect was greater for treated than for untreated plots,  
143 meaning that in treated plots the STB reduction from mixing was larger than in untreated plots. When comparing  
144 mixtures with the single most grown cultivar, reductions were similar although there were no differences between  
145 treated and untreated plots (data not shown). Disease reduction was significant in all cultivar mixtures shown in  
146 fig 2 (all  $p < 0.001$ ).

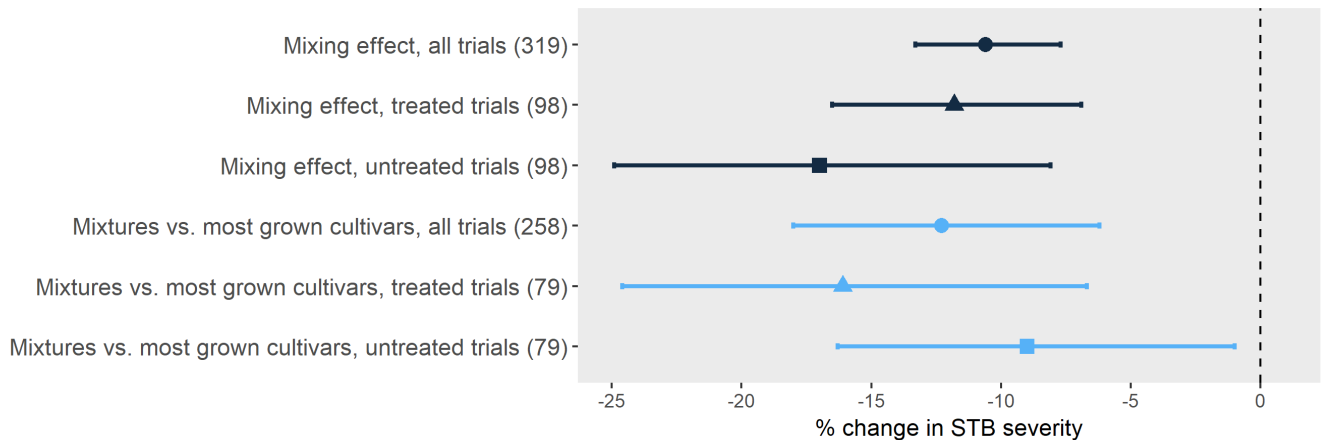

Figure 2: Mixing effects measured as % change in STB severity. The upper three effects (black lines) are mixing effects relative to the average of the component cultivars. The lower three effects (blue lines) are STB of mixtures relative to the average of the four most grown cultivars the given year. The effects were evaluated both across all trials (●) and separately for treated (▲) and untreated trials (■). Mean values and 95% confidence intervals are shown. In parenthesis is the number of mixture data points for each effect,  $k$ .

147 *3.1.1. Disease pressure*

148 The reduction in STB severity in mixtures was expected to increase with increasing disease pressure. Against  
149 expectations, this could not be confirmed regardless of the disease pressure was measured in treated or untreated  
150 plots. The effect sizes were numerically small and non-significant (data not shown). Measuring disease pressure  
151 indirectly via the estimated yield increase from fungicide applications at the trial site also did not show an effect on  
152 the STB mixing effect. Expanding this to broader disease pressure regions yielded numerically higher effect sizes,  
153 but with equally high variation and lack of significance (data not shown).

154 *3.1.2. Mixture composition*

155 The effect of mixture composition with regards to STB susceptibility was evaluated based on the mean (compo-  
156 nent susceptibility average) or the variability (measured as range or standard deviation) in component susceptibility.  
157 However, neither of these were found to affect the STB mixing effect.

158 Dividing components into categories of either 'susceptible' or 'resistant' showed an impact on STB mixing effect  
159 (figure 3). If the threshold for a resistant cultivar was set to either 4% or 5% STB mixtures with one (25%) resistant  
160 cultivar were most successful in reducing STB severity, as compared to the average of component cultivars in pure  
161 stand. If the threshold was set to 6% or 7% STB, there was no difference between mixtures compositions. The 4%  
162 threshold was the only case where a mixture exceeded 20% STB reduction. Only threshold 4% and 7% were included  
163 in figure 3. Given that the mixtures were not designed to include specific proportions of susceptible and resistant

164 cultivars, the number of mixtures in each category varied between thresholds (table 4). If the threshold was set to  
 165 5% STB there was eight mixtures with no resistant cultivars and only two mixtures with two resistant cultivars.  
 166 The composition with the highest reduction (4% STB susceptibility, one resistant cultivar) is only represented by  
 167 one mixture.

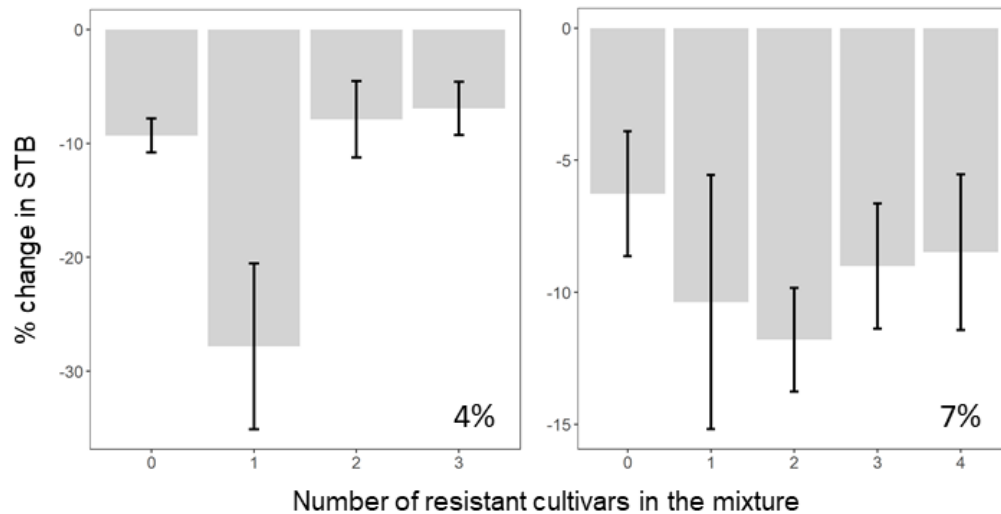

Figure 3: Effect of the ratio of resistant/susceptible component cultivars on STB mixing effect. Threshold of what constitutes a resistant cultivar shown for <4% STB (left) and <7% STB (right). X-axis denotes number of resistant cultivars in the mixture, y-axis denotes STB mixing effect. Bars represent mean effect and error bars +/- standard deviation.

Table 4: Number of cultivar mixtures available in the data set for mixtures with different proportions of resistant cultivars. The number of mixtures varied depending on the threshold for what defines a resistant cultivar. The resistance threshold was set to different values of STB severity measured as % disease cover in treated plots.

| Resistance threshold (%STB) | Resistant cultivars in the mixture |     |     |       |      |
|-----------------------------|------------------------------------|-----|-----|-------|------|
|                             | None                               | One | Two | Three | Four |
| 4%                          | 11                                 | 1   | 3   | 3     | 0    |
| 5%                          | 8                                  | 4   | 2   | 3     | 1    |
| 6%                          | 7                                  | 4   | 2   | 4     | 1    |
| 7%                          | 5                                  | 1   | 6   | 4     | 2    |

### 168 3.2. Mixing effect on grain yield

169 Mixtures gave an overall grain yield increase of 1.4% compared to the average of the component cultivars (figure  
 170 4). The effect was greater in untreated plots showing a yield increase of 2.4%. Mixtures also increased yield with  
 171 1.4% compared to an average of the four most grown cultivars a given year (figure 4). The yield increase was equally  
 172 greater for untreated plots with a yield increase of 2.9%. The findings were similar when comparing mixtures with  
 173 only the single most grown cultivar (data not shown). All yield increases were significant ( $p < 0.001$ ) except for the  
 174 comparison with the most grown cultivars in treated plots ( $p < 0.5$ ). The greater yield increases in untreated plots  
 175 could indicate a correlation between STB reductions and yield increases in mixtures. however, such a correlation  
 176 could not be confirmed (figure 5). This was true when looking at trials overall, at untreated trials only and when  
 177 looking specifically under high disease pressure.



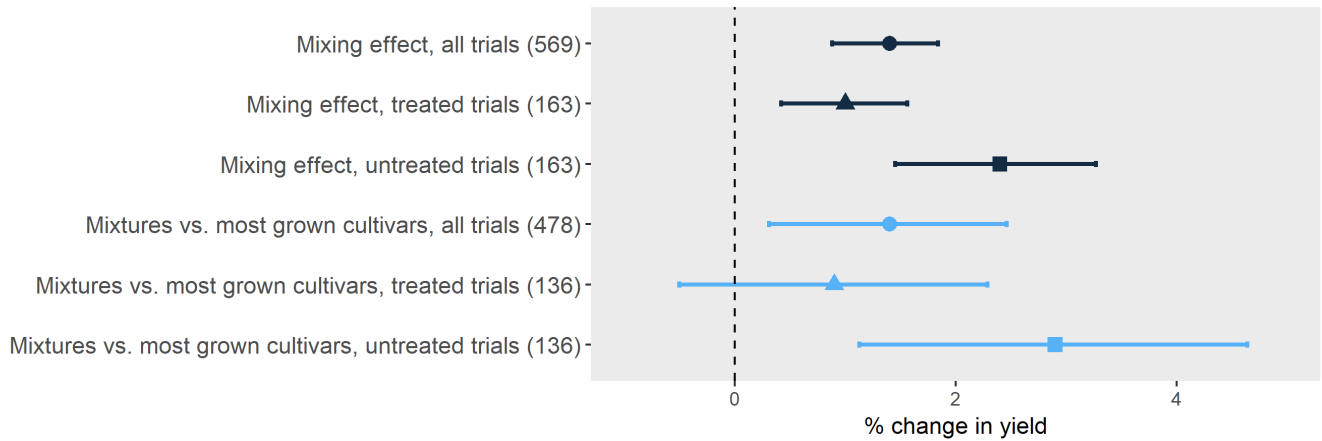

Figure 4: Mixing effects measured as % change in yield. The upper three effects (black lines) are mixing effects relative to the average of the component cultivars. The lower three effects (blue lines) are yield of mixtures relative to the average of the four most grown cultivars the given year. The effects were evaluated both across all field trials (●) and separately for treated (▲) and untreated trials (■). In parenthesis is the number of mixture data points for each effect,  $k$ . Mean values and 95% confidence intervals are shown.

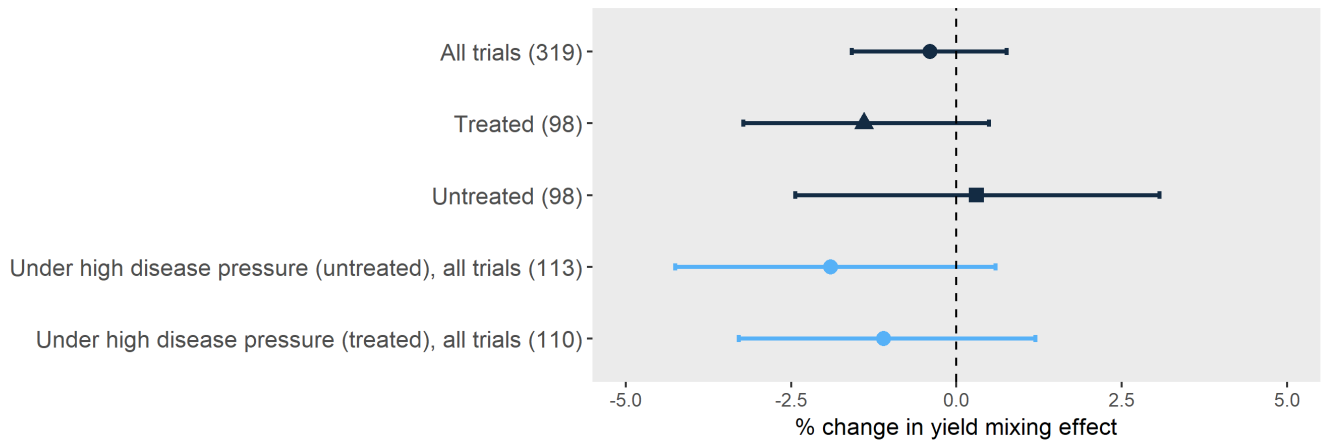

Figure 5: Effect of STB mixing effect on yield mixing effect (% change). The upper three effects (black lines) were evaluated both across all field trials (●) and separately for treated (▲) and untreated trials (■). The lower two effects (blue lines) are based on trials with high disease pressure (mean STB of all pure stand cultivars >8%), measured from untreated and treated plots, respectively. In parenthesis is the number of mixture data points for each effect,  $k$ . Mean values and 95% confidence intervals are shown.

## 178 4. Conclusion and discussion

### 179 4.1. Mixtures reduce STB and increase yields

180 The cultivar mixtures in this study were successful at reducing STB and increasing yields compared with their  
 181 pure stand counterparts. This was in line with the overall positive results obtained in the previous mixtures studies  
 182 conducted with STB (Cowger and Mundt, 2002; Gigot et al., 2013; Mille et al., 2006; Vidal et al., 2017a) and  
 183 the extensive studies documenting yield increases from mixtures (Kiær et al., 2009; Borg et al., 2018; Reiss and  
 184 Drinkwater, 2018). It has, however, not previously been documented that cultivar mixtures performed better  
 185 than the average of the most grown cultivars in a given season. The study found significant mixing effects and

186 supported hypotheses 1) and 2): Non-designed cultivar mixtures of elite cultivars reduced STB severity and increased  
187 yields compared to the average of component cultivars and the mixtures reduced STB severity and increased yield  
188 compared to the most grown cultivar in a given season.

#### 189 4.2. *The impact of disease pressure*

190 STB mixing effect has been reported to vary with disease pressure (Cowger et al., 2000; Gigot et al., 2013)  
191 and the lack of correlation between these factors shown in this study was unexpected. The absence of impact  
192 from disease pressure could be explained for a large part by the field trial data being in the lower range of disease  
193 pressure, leaving few trials with high disease pressure to observe any significant differences. It appears to be to  
194 common practice in the studied field trials to avoid mixing naturally senescent leaf area with diseased area at late  
195 growth stages by only assessing disease on green leaves (Ghita Cordsen Nielsen, personal communication). This  
196 practice will tend to underestimate the disease pressure especially in the most susceptible cultivars. Even though a  
197 guideline exists, the disease assessments were carried out by different persons which could have influenced the disease  
198 severity scale. This is not an issue for the mixing effect itself as it is relative to components from the same trial,  
199 assessed by the same person throughout the season. The second analysis with indirect disease pressure calculated  
200 from the fungicide-yield response map had the potential to provide a more stable and objective measurement of  
201 disease pressure. However, this indirect disease pressure did not correlate with STB mixing effect either. The  
202 weakness of using the fungicide response is that it cannot be quantified how much of the response was caused by the  
203 STB severity. Even though STB is considered the most yield limiting disease other diseases might have influenced  
204 the results at certain locations. The study could not provide an explanation to the variation in the mixing effects  
205 based on disease pressure.

#### 206 4.3. *Correlations between STB and yield*

207 Diseases are among the factors to have the highest impact on yield mixing effect (Borg et al., 2018). It was  
208 not evident that the reduction in STB from mixtures was the sole cause of the yield increase in this study and a  
209 significant yield increase would not be expected from just a 10% STB reduction. However, as both the STB and  
210 yield effects were larger in untreated trials it could indicate a correlation. STB is the most important disease in  
211 Danish winter wheat production (Jørgensen et al., 2014) and was the only disease included in this study. Other  
212 diseases that are of less importance could theoretically affect the results and mixing effects are well-documented for  
213 wind borne diseases such as rust diseases (*Pucciniales*) and powdery mildew (*Blumeria graminis*) (Finckh et al.,  
214 2000; Huang et al., 2012; Newton et al., 2002). Other factors can contribute to the yield mixing effect as well such  
215 as nutrient utilization, canopy cover, winter hardiness, proneness to lodging etc. (Bessler et al., 2009; Bowden et al.,  
216 1980; Jackson and Wennig, 1997; Sarandon and Sarandon, 2006; Vidal et al., 2017b). It cannot be excluded that  
217 these other factors have had an impact on the yield mixing effect found in this study. However, as the only difference  
218 between treated and untreated trials was the fungicide application, it would be unlikely that abiotic factors would  
219 contribute differently to the yield mixing effects. Hypothesis 3) could not be confirmed. The results did not directly  
220 support that lower STB severity in mixtures contributed to higher yields in the mixtures. Further investigations  
221 are needed to explain the effect difference between treated and untreated trials.

#### 222 4.4. *Predicting mixing effects from components*

223 The results provided no clear answers as to how mixtures should be designed. The components in the mixtures  
224 were not selected based on susceptibility to STB and can thus only indirectly be used to evaluate mixture design.  
225 In this study, neither high variation in component susceptibility or mixtures with overall very susceptible or very  
226 resistant components correlated with mixing effects on STB or yields. A common approach in mixture studies is to  
227 compare mixtures with different ratios of susceptible and resistant cultivars (Wolfe, 1985) and analysing composition  
228 in this way had an impact on the mixing effects. However, in the current study the impact varied greatly depending

229 on where the threshold for a resistant cultivar was placed. Based on this analysis a cultivar mixture with only  
230 one cultivar with less than 4% STB performed best. As there was only one mixture in the study that matched  
231 this criterion the result would need further validation. Increasing the threshold to 5% gave four mixtures with  
232 one resistant component, but did not provide as high a reduction as with the 4% threshold. The mixtures in this  
233 study were not designed to evaluate the effect of the ratio of resistant/susceptible cultivars and primarily contain  
234 cultivars that are moderately resistant to STB. The susceptibility difference in designed mixtures could be much  
235 higher than in this study. Some caution should be taken before applying the results from this study directly to  
236 conclude on mixture design as the components of the mixtures in the cultivar testing are changed every year and  
237 the performance to a specific mixture composition and the effect of the year cannot be excluded from the mixture  
238 performance. We found only partial support for hypothesis 4) that STB score of components from the previous  
239 season would be able to predict STB mixing effects.

#### 240 *4.5. Relevance of cultivar mixtures in practice*

241 There is a need to change disease management to include a strategy where the cultivar genetics are utilized  
242 more efficiently for disease control. The use of cultivar mixtures is an easy tool that is ready to be implemented.  
243 For growers there is an incentive to grow mixtures as they both perform better than the average of the pure  
244 stand cultivars and better than the cultivars the farmers would otherwise choose. An argument often used against  
245 mixtures is that they do not perform better than the most resistant or highest yielding cultivar. This argument  
246 does not take into account that it is hard to predict which cultivar performs best the coming season. To reduce the  
247 risk of choosing the wrong cultivar a farmer might sow more than one cultivar on their farm and could reduce the  
248 risk further by sowing these cultivars in mixture. The reductions in STB severity observed in this study were not  
249 large enough to provide a significant disease control alone. If the results with non-designed mixtures can be viewed  
250 as a baseline of STB control by cultivar mixtures, mixtures specifically designed to control STB can be expected to  
251 yield higher and this could improve disease control and play a more important part in integrated pest management.  
252 Breeders may argue that instead of using cultivar mixtures, higher levels of resistance or more durable resistance  
253 to diseases should be achieved through pyramiding of genes in individual cultivars. This method has, however,  
254 not unequivocally solved issues with disease resistance in breeding (Grimmer et al., 2015) and cannot replace the  
255 mechanisms of cultivar mixtures. The ability of cultivar mixtures to suppress disease is commonly ascribed to the  
256 spatial distribution of resistance genes (Borg et al., 2018; Gigot et al., 2014; Newton and Guy, 2011). Application  
257 of mixtures in real farm settings with larger field sizes (Finckh et al., 2000) and more patchy distributions of the  
258 cultivars (Newton and Guy, 2009) are likely to contribute to larger effects as well. A criterion for cultivar mixtures  
259 to be relevant in practical agriculture was that they did not have any negative impacts on yield and they did result  
260 in a statistically significant yield increase. The yield increase of 1.5-2.5% might not be large but it is, as mentioned  
261 by Reiss and Drinkwater (2018), on level with the yield increase achieved through breeding. Some of the main  
262 barriers for wider use of cultivar mixtures are farming traditions and lack of incentive from seed companies when  
263 mixing components from different breeders including issues with royalties. The use of cultivar mixtures is especially  
264 well suited for farm types that predominantly use cereals for animal feed as is the typical scenario in Denmark  
265 (Lundø, 2017). It is more challenging to implement cultivar mixtures in malting barley and bread wheat production  
266 where the maltsters and millers typically require cultivars grown as monocultures (Finckh et al., 2000).

267 The results provide a solid basis for implementing cultivar mixtures in the wheat production. However, in order  
268 to optimise mixture design and improve performance more thoroughly designed trials are needed.

## 269 **5. Acknowledgements**

270 The authors wish to thank the Danish Technological Institute for providing the trial data and Thies Marten  
271 Heick (Aarhus University) and Jeanine Raw (University of Salford) for proofreading the manuscript.

## 272 6. References

- 273 Barot, S., Allard, V., Cantarel, A., Enjalbert, J., Gauffreteau, A., Goldringer, I., Lata, J.-C., Le Roux, X., Niboyet,  
274 A., and Porcher, E. (2017). Designing mixtures of varieties for multifunctional agriculture with the help of ecology.  
275 A review. *Agron. Sustain. Dev.*, 37(2):13.
- 276 Bates, D., Mächler, M., Bolker, B., and Walker, S. (2015). Fitting Linear Mixed-Effects Models Using lme4. *J.*  
277 *Stat. Softw.*, 67(1):1–48.
- 278 Bessler, H., Temperton, V. M., Roscher, C., Buchmann, N., Schulze, E.-d., Weisser, W. W., and Engels, C.  
279 (2009). Aboveground Overyielding in Grassland Mixtures Is Associated with Reduced Biomass Partitioning to  
280 Belowground Organs Published by : Ecological Society of America Linked references are available on JSTOR for  
281 this article : Your use of the JSTOR archiv. *Ecology*, 90(6):1520–1530.
- 282 Borg, J., Kiær, L. P., Lecarpentier, C., Goldringer, I., Gauffreteau, A., Saint-Jean, S., Barot, S., and Enjalbert,  
283 J. (2018). Unfolding the potential of wheat cultivar mixtures: A meta-analysis perspective and identification of  
284 knowledge gaps. *F. Crop. Res.*, 221(September 2017):298–313.
- 285 Bowden, R. L., Shroyer, J. P., Roozeboom, K. L., and Claassen, M. (1980). Performance of Wheat Variety Blends  
286 in Kansas. *Kansas Agric. Exp. Stn. Res. Reports*, 0(12).
- 287 Cowger, C., Hoffer, M. E., and Mundt, C. C. (2000). Specific adaptation by *Mycosphaerella graminicola* to a  
288 resistant wheat cultivar. *Plant Pathol.*, 49(4):445–451.
- 289 Cowger, C. and Mundt, C. C. (2002). Effects of wheat cultivar mixtures on epidemic progression of *Septoria tritici*  
290 blotch and pathogenicity of *Mycosphaerella graminicola*. *Phytopathology*, 92(6):617–623.
- 291 Eurostat (2015). Farm Structure Statistics.
- 292 Finckh, M. R., Gacek, E. S., Goyeau, H., Lannou, C., Merz, U., Mundt, C. C., Munk, L., Nadziak, J., Newton,  
293 A. C., de Vallavieille-Pope, C., and Wolfe, M. S. (2000). Cereal variety and species mixtures in practice, with  
294 emphasis on disease resistance. *Agronomie*, 20(7):813–837.
- 295 Fones, H. and Gurr, S. (2015). The impact of *Septoria tritici* Blotch disease on wheat: An EU perspective. *Fungal*  
296 *Genet. Biol.*, 79:3–7.
- 297 Food and Agriculture Organization of the United Nations (2019). FAOSTAT statistics database.
- 298 Gigot, C., De Vallavieille-Pope, C., Huber, L., and Saint-Jean, S. (2014). Using virtual 3-D plant architecture to  
299 assess fungal pathogen splash dispersal in heterogeneous canopies: A case study with cultivar mixtures and a  
300 non-specialized disease causal agent. *Ann. Bot.*, 114(4):863–876.
- 301 Gigot, C., Saint-Jean, S., Huber, L., Maumené, C., Leconte, M., Kerhornou, B., and de Vallavieille-Pope, C. (2013).  
302 Protective effects of a wheat cultivar mixture against splash-dispersed *septoria tritici* blotch epidemics. *Plant*  
303 *Pathol.*, 62(5):1011–1019.
- 304 Grimmer, M. K., Boyd, L. A., Clarke, S. M., and Paveley, N. D. (2015). Pyramiding of partial disease resistance  
305 genes has a predictable, but diminishing, benefit to efficacy. *Plant Pathol.*, 64(3):748–753.
- 306 Hedges, L. V., Gurevitch, J., and Curtis, P. S. (1999). The meta-analysis of response ratios in experimental ecology.  
307 *Ecology*, 80(4):1150–1156.
- 308 Huang, C., Sun, Z., Wang, H., Luo, Y., and Ma, Z. (2012). Effects of wheat cultivar mixtures on stripe rust: A  
309 meta-analysis on field trials. *Crop Prot.*, 33:52–58.

- 310 Jackson, L. F. and Wennig, R. W. (1997). Use of wheat cultivar blends to improve grain yield and quality and  
311 reduce disease and lodging. *F. Crop. Res.*, 52(3):261–269.
- 312 Jørgensen, L. N., Hovmøller, M. S., Hansen, J. G., Lassen, P., Clark, B., Bayles, R., Rodemann, B., Flath, K.,  
313 Jahn, M., Goral, T., and Others (2014). IPM strategies and their dilemmas including an introduction to www.  
314 eurowheat.org. *J. Integr. Agric.*, 13(2):265–281.
- 315 Jørgensen, L. N., Nielsen, B. J., Mathiassen, S. K., Jensen, P. K., Kristjansen, H. S., Heick, T. M., Vagndorf, N.,  
316 Hartvig, P., and Sørensen, S. (2017). Applied Crop Protection 2017. Technical report, Aarhus University.
- 317 Kiær, L. P., Skovgaard, I. M., and Østergård, H. (2009). Grain yield increase in cereal variety mixtures: A  
318 meta-analysis of field trials. *F. Crop. Res.*, 114(3):361–373.
- 319 Kildea, S., Mehenni-Ciz, J., Dooley, H., Shaw, M. W., and Spink, J. (2016). Detection of *Zymoseptoria tritici*  
320 SDHI-insensitive field isolates carrying the SdhC -H152R and SdhD -R47W substitutions. *Pest Manag. Sci.*,  
321 72(12):2203–2207.
- 322 Kirikyali, N., Diez, P., Luo, J., Hawkins, N., and Fraaije, B. (2017). Azole and SDHI Sensitivity of *Zymoseptoria*  
323 *tritici* Field Populations Sampled in France, Germany and United Kingdom during 2015. In *Mod. Fungic.*  
324 *Antifung. Compd. VIII*, volume VIII, pages 153–158.
- 325 Lundø, M. (2017). Høsten af korn, raps og bælgæd 2017. *Nyt fra Danmarks Stat.*, 454(454):2017–2018.
- 326 McCann, K. S. (2000). The diversity-stability debate. *Nature*, 405(6783):228.
- 327 McDonald, B. A. and Stukenbrock, E. H. (2016). Rapid emergence of pathogens in agro-ecosystems: global threats  
328 to agricultural sustainability and food security. *Phil. Trans. R. Soc. B*, 371(1709):20160026.
- 329 Mille, B., Fraj, M. B., Monod, H., and de Vallavieille-Pope, C. (2006). Assessing four-way mixtures of winter  
330 wheat cultivars from the performances of their two-way and individual components. *Eur. J. Plant Pathol.*,  
331 114(2):163–173.
- 332 Newton, A. C. and Guy, D. (2009). The effects of uneven, patchy cultivar mixtures on disease control and yield in  
333 winter barley. *F. Crop. Res.*, 110(3):225–228.
- 334 Newton, A. C. and Guy, D. C. (2011). Scale and spatial structure effects on the outcome of barley cultivar mixture  
335 trials for disease control. *F. Crop. Res.*, 123(2):74–79.
- 336 Newton, A. C., Guy, D. C., Nadziak, J., and Gacek, E. S. (2002). The Effect of Inoculum Pressure, Germplasm  
337 Selection and Environment on Spring Barley Cultivar Mixtures Efficacy. *Euphytica*, 125:325–335.
- 338 Nielsen, G. C. and Bang, S. S. (2018). Resultater fra registreringsnettet 2018.
- 339 Nielsen, G. C. and Trénel, P. (2017). Merudbytter for svampesprøjtning i vinterhvede i forskellige landsdele.
- 340 Pedersen, J. B. (1995). *Oversigt over Landsforsøgene 1995*, chapter Kornsorter, pages 5–16. Landbrugets  
341 Rådgivningscenter.
- 342 R Core Team (2018). *R: A Language and Environment for Statistical Computing*. R Foundation for Statistical  
343 Computing, Vienna, Austria.
- 344 Reiss, E. R. and Drinkwater, L. E. (2018). Cultivar mixtures: a meta-analysis of the effect of intraspecific diversity  
345 on crop yield. *Ecol. Appl.*, 28(1):62–77.

- 346 Sarandon, S. J. and Sarandon, R. (2006). Mixture of Cultivars: Pilot Field Trial of an Ecological Alternative to  
347 Improve Production or Quality of Wheat (*Triticum aestivum*). *J. Appl. Ecol.*, 32(2):288.
- 348 Smithson, J. B. and Lenné, J. M. (1996). Varietal mixtures: A viable strategy for sustainable productivity in  
349 subsistence agriculture. *Ann. Appl. Biol.*, 128(1):127–158.
- 350 Stenberg, J. A. (2017). A conceptual framework for integrated pest management. *Trends Plant Sci.*, 22(9):759–769.
- 351 Torriani, S. F., Melichar, J. P., Mills, C., Pain, N., Sierotzki, H., and Courbot, M. (2015). Zymoseptoria tritici: A  
352 major threat to wheat production, integrated approaches to control. *Fungal Genet. Biol.*, 79:8–12.
- 353 Vidal, T., Boixel, A. L., Durand, B., de Vallavieille-Pope, C., Huber, L., and Saint-Jean, S. (2017a). Reduction of  
354 fungal disease spread in cultivar mixtures: Impact of canopy architecture on rain-splash dispersal and on crop  
355 microclimate. *Agric. For. Meteorol.*, 246(June):154–161.
- 356 Vidal, T., Lusley, P., Leconte, M., De Vallavieille-Pope, C., Huber, L., and Saint-Jean, S. (2017b). Cultivar  
357 architecture modulates spore dispersal by rain splash: A new perspective to reduce disease progression in cultivar  
358 mixtures. *PLoS One*, 12(11):1–16.
- 359 Viechtbauer, W. (2010). Conducting meta-analyses in {R} with the {metafor} package. *J. Stat. Softw.*, 36(3):1–48.
- 360 Wolfe, M. S. (1985). The current status and prospects of multiline cultivars and variety mixtures for disease  
361 resistance. *Annu. Rev. Phytopathol.*, 23(1):251–273.
